# Supplementary material
Source: PubMed Central journal article supplement (PMC5391843)
Supplement: NIHMS819011-supplement-Methods_and_Material.pdf [file NIHMS819011-supplement-Methods_and_Material.pdf]

## Materials and Methods

### Cell culture and shear stress experiments

HUVECs were cultured in medium M199 supplemented with 15% fetal bovine serum, 3 ng/mL  $\beta$ -EC growth factor, 4 U/mL heparin, and 100 U/mL penicillin-streptomycin. MEFs and HEK293 cells were cultured in DMEM containing 10% FBS. For shear stress experiments, the flow rate was 12 dyne/cm<sup>2</sup>. The oscillatory stimulator was connected to the circulating system to generate a magnitude of 4 dyne/cm<sup>2</sup> with oscillation at 1 Hz.

### Antibodies and reagents

The antibodies used were anti-cortactin and anti-acetyl-cortactin (Millipore); anti-pan-AMPK, anti-phospho-AMPK Thr-172, and anti-eNOS (Cell Signaling Technology); anti-phospho-eNOS 633/635, 1177/1179 and anti-flot-2 (BD Transduction Laboratory). Decetylation-deficient mimic (9KQ) and deacetylation mimic (9KR) mutants were described.<sup>1</sup> Rhodamine phalloidin was purchased from Cytoskeleton, Inc. Site-direct mutagenesis was used to generate phospho-deficient cortactin T401A and phospho-mimic T401D, T401A/9K/Q, and T401D/9K/R mutants. Recombinant adenovirus (Ad)-AMPK-CA and Ad-SIRT1 expressing a constitutively active form of AMPK $\alpha$ 2 and full-length SIRT1 were described previously.<sup>2</sup>

### In vitro kinase assay

AMPK kinase assays were conducted in 50  $\mu$ L reaction buffer containing 50 mM Hepes, 0.38 mM AMP, 0.38 mM ATP, 9 mM MgCl<sub>2</sub>, 11 pM AMPK $\alpha$ , and 2  $\mu$ g of recombinant cortactin at 37 °C for 1 hr. Reaction mixtures were then resolved by SDS-PAGE followed by Coomassie blue staining or autoradiography. Identical reaction conditions were used for assays with synthetic peptides as substrates. Radioactivity of the peptide substrates was determined by a standard protocol.

### Nano-LC-MS/MS tandem mass spectrometry

Kinase reaction mixtures were resolved by 10% SDS-PAGE. The bands containing cortactin were excised and proteins were reduced in-gel, alkylated with iodoacetamide, and digested with trypsin at 37°C. Peptides were extracted with 5% acetic acid in H<sub>2</sub>O, then 5% acetic acid in CH<sub>3</sub>CN/H<sub>2</sub>O (1:1, vol/vol). Online LC-MS/MS analysis was performed with an LTQ-Orbitrap Velos mass spectrometer coupled with an EASY n-LCII HPLC system and a nanoelectrospray ionization source for peptide sequencing and phosphorylation identification. The LC-MS/MS data were analyzed by Mascot Server 2.2 (Matrix Science) for the mass-to-charge (m/z) ratio data files against the National Center for Biotechnology Information database.

### siRNA knockdown and transient transfection

Transient transfection of siRNA involved use of lipofectamine RNAiMAX (Invitrogen). HUVECs at 70% confluence were transfected with AMPK $\alpha$ 1 and AMPK $\alpha$ 2 siRNA (10 nM, Qiagen SI02622235 and SI02758595), SIRT1 siRNA (20 nM, Qiagen, SI00098434), cortactin siRNA (20 nM, Qiagen SI02661960), or scramble RNA (20 nM) in Opti-MEM (Gibco). HEK293 cells were transiently transfected with 1  $\mu$ g of respective DNA plasmid with 2  $\mu$ L Lipofectamine 2000 (Invitrogen) per 10<sup>6</sup> cells. At 24 hr after transfection, cells were infected with Ad-AMPK or Ad-SIRT1 for another 48 hr before use.

### Immunoblotting, immunoprecipitation, NO bioavailability, and RT-qPCR

Cell lysates or mouse aortic extracts were resolved by 10% SDS-PAGE. Immunoblotting and immunoprecipitation were performed with standard methods. NO production was assessed as the accumulated nitrite ( $\text{NO}^{2-}$ ) in cell culture media by nitrite/nitrate fluorometric assay (Cayman Chemicals) or Griess reagent (Sigma). Total RNA was isolated with TRIzol reagent (Invitrogen). Reverse transcription involved use of SuperScript II reverse transcriptase (Invitrogen). RT-qPCR involved iQ SYBR Green supermix (Bio-Rad) on the iCycler real-time PCR detection system (Bio-Rad); primers are listed in Supplemental Table 3.

### **Lipid raft isolation and analysis**

Cells were lysed and the homogenate was mixed with an equal volume (1 ml) of MES-buffered saline (25 mM MES, pH 6.5, 150 mM NaCl, 500 mM  $\text{Na}_2\text{CO}_3$ ) containing 80% sucrose. A volume of 6 ml of MES-buffered saline containing 30% sucrose was layered on top, then 4 ml MES-buffered saline containing 5% sucrose. Gradients were centrifuged for 16 hr at 30,000 rpm in an SW41 rotor. Tubes were fractionated into twelve 1 ml fractions.

### **Immunostaining and fluorescence microscopy**

ECs were fixed in 4% paraformaldehyde for 10 min at 4°C and subjected to permeabilization. Triton X-100 (0.1%) was added to PBS to permeate the cell membrane at 4 °C for 10 min. For en face staining, mouse aortas were perfused, isolated, and fixed. After blocking in 2.5% BSA for 20 min, then primary antibody for 1 hr, specimens were incubated for 2 hr with Alex-488 (anti-mouse)- or Alex-568 (anti-rabbit)-conjugated secondary antibody. Rhodamine phalloidin was used to stain F-actin. An Olympus FV100 confocal microscope was used to acquire the fluorescent images.

### **Flow-induced vessel dilation and assessment of atherosclerosis**

The animal protocols were approved by University of California San Diego Institutional Animal Care and Use Committee. ApoE<sup>-/-</sup> mice (B6.129P2-ApoE<sup>tm1Unc</sup>/J, stock number 002052) were from the Jackson Laboratory. The cortactin<sup>+/-</sup> mouse line (in C57BL/6j background) was obtained from Dr. Steven Dudek (University of Illinois, Chicago).<sup>3</sup> For the flow-induced vessel dilation experiment, 8- to 10-week-old male cortactin<sup>+/-</sup> mice and their cortactin<sup>+/+</sup> littermates were used to evaluate the flow-induced vasodilation as described.<sup>4</sup> Cerebellar microvessels were dissected and cannulated with the perfusion chamber connected to the SoftEdge Acquisition Subsystem (Living Systems, Burlington, VT). The vessels were perfused with a buffer containing 130 mM NaCl, 10 mM HEPES, 6 mM glucose, 4 mM KCl, 4 mM  $\text{NaHCO}_3$ , 1.8 mM  $\text{CaCl}_2$ , 1.18 mM  $\text{KH}_2\text{PO}_4$ , 1.2 mM  $\text{MgSO}_4$  and 0.025 mM EDTA, pH 7.4. Phenylephrine (1  $\mu\text{M}$ ) was used to obtain maximal vasoconstriction, followed by flow perfusion at 400  $\mu\text{l}/\text{min}$ . The external diameter of the vessels was monitored and recorded as percentage of vasodilation. For atherosclerosis experiments, ApoE<sup>-/-</sup> mice were bred with a cortactin<sup>+/-</sup> line to generate cortactin<sup>+/-</sup> mice with an ApoE-null background. Eight-week-old male ApoE<sup>-/-</sup>/cortactin<sup>+/+</sup> mice and their ApoE<sup>-/-</sup>/cortactin<sup>+/-</sup> littermates were fed a high-fat, high-cholesterol Paigen diet containing 15% fat, 1.25% cholesterol, and 0.5% sodium cholate (Harlan Teklad) ad libitum for 10 weeks. Animals were then killed and aortas isolated. Aortic specimens were stained with Oil-red O to assess lesion severity and distribution.

### **Transmission electron microscopy**

Mice were scarified and perfused through the left ventricle with PBS followed by fixative (2% paraformaldehyde, 2% glutaraldehyde in PBS, pH 7.4). The aortas were isolated and kept in

fixative overnight. Samples were then washed 3 times with 0.15 M sodium cacodylate buffer and fixed with 2% OsO<sub>4</sub> followed by 0.8% potassium ferrocyanide in 0.15 M sodium cacodylate buffer for 1 hr. The specimens were stained overnight in 2% uranyl acetate, dehydrated, and embedded into Durcupan resin. Ultra-thin sections (60-70 nm) were stained with 2% uranyl acetate and saturated lead citrate solution, and examined under a JEOL-1200EX transmission electron microscope at an accelerating voltage of 80 kV. TEM was performed at the National Center for Microscopy and Imaging Research, University of California, San Diego.

### Statistical analysis

Data are expressed as mean  $\pm$  SEM (n=3 unless otherwise noted). For parametric data that were normally distributed, Student *t* test was used to analyze differences among groups. For nonparametric data, the Mann-Whitney U test with the exact method was used to analyze differences between 2 groups. *P*<0.05 was considered statistically significant.

### References

1. Zhang X, Yuan Z, Zhang Y, Yong S, Salas-Burgos A, Koomen J, Olashaw N, Parsons JT, Yang XJ, Dent SR, Yao TP, Lane WS, Seto E. HDAC6 modulates cell motility by altering the acetylation level of cortactin. *Mol. Cell.* 2007;27:197-213.
2. Chen Z, Peng IC, Cui X, Li YS, Chien S, Shyy JY. Shear stress, SIRT1, and vascular homeostasis. *Proc. Natl. Acad. Sci. U.S.A.* 2010;107:10268-10273.
3. Yu D, Zhang H, Blanpied TA, Smith E, Zhan X. Cortactin is implicated in murine zygotic development. *Exp. Cell Res.* 2010;316:848-858.
4. Wen L, Chen Z, Zhang F, Cui X, Sun W, Geary GG, Wang Y, Johnson DA, Zhu Y, Chien S, Shyy JY. Ca<sup>2+</sup>/calmodulin-dependent protein kinase kinase beta phosphorylation of Sirtuin 1 in endothelium is atheroprotective. *Proc. Natl. Acad. Sci. U.S.A.* 2013;110:E2420-E2427.
