# Supplementary material
Source: PubMed Central journal article supplement (PMC5391843)
Supplement: NIHMS819011-supplement-Supplementary_data.pdf [file NIHMS819011-supplement-Supplementary_data.pdf]

Supplement Material

**AMPK and SIRT1 Coregulation of Cortactin Contributes to Endothelial Function**

Supplementary Figure I-IX

Supplementary Table I-III

## Supplemental Figure I

```

mouse      MWKASAGHAVSITQDDGGADDWETDPDFVNDVSEKEQRWGAKTVQSGHQEHINIHKLRE 60
RAT        MWKASAGHAVSITQDDGGADDWETDPDFVNDVSEKEQRWGAKTVQSGHQEHINIHKLRE 60
Human     MWKASAGHAVSIAQDDAGADDWETDPDFVNDVSEKEQRWGAKTVQSGHQEHINIHKLRE 60
*****.***.*****

mouse      NVFQEHQTLKEKELETGPKASHGYGGKFGVEQDRMDRSAVGHEYQSKLSKHCSQVDSVRG 120
RAT        NVFQEHQTLKEKELETGPKASHGYGGKFGVEQDRMDKSAVGHEYQSKLSKHCSQVDSVRG 120
Human     NVFQEHQTLKEKELETGPKASHGYGGKFGVEQDRMDKSAVGHEYQSKLSKHCSQVDSVRG 120
*****:*****

mouse      FGGKFGVQMDRVDQSAVGFYQGGKTEKHASQKDYSSGFGGKYGVQADRVDKSAVGFQYQG 180
RAT        FGGKFGVQMDRVDQSAVGFYQGGKTEKHASQKDYSSGFGGKYGVQADRVDKSAVGFQYQG 180
Human     FGGKFGVQMDRVDQSAVGFYQGGKTEKHASQKDYSSGFGGKYGVQADRVDKSAVGFQYQG 180
*****:*****

mouse      KTEKHESQKDYSGFGGKYGIDKDKVDKSAVGFYQGGKTEKHESQKDYVKGFGGKFGVQT 240
RAT        KTEKHESQKDYSGFGGKYGIDKDKVDKSAVGFYQGGKTEKHESQKDYVKGFGGKFGVQT 240
Human     KTEKHESQKDYSGFGGKYGIDKDKVDKSAVGFYQGGKTEKHESQKDYVKGFGGKFGVQT 240
*****.*****

mouse      DRQDKCALGWDHQEKLQLHESQKDYKTGFGGKFGVQSERQDSSAVGFYKERLAKHESQQ 300
RAT        DRQDKCALGWDHQEKLQLHESQK----- 263
Human     DRQDKCALGWDHQEKLQLHESQKDYKTGFGGKFGVQSERQDSSAAVGFYKEKLAKHESQQ 300
*****

mouse      DYAKGFGGKYGVQKDRMDKNASTFEEVVQVPSAYQKTVPVIEAVTSKTSNIRANFENLAKE 360
RAT        DYAKGFGGKYGVQKDRMDKNASTFEEVVQVPSAYQKTVPVIEAVTSKTSNIRANFENLAKE 323
Human     DYSKGFGGKYGVQKDRMDKNASTFEDVTQVSSAYQKTVPVIEAVTSKTSNIRANFENLAKE 360
**.*.....:*.**.*.....:*****

mouse      REQEDRRKAEAEARAQMAKERQEQEARRKLEEQARAKKQTPPASPSQPPIEDRPPSSPI 420
RAT        REQEDRRKAEAEARAQMAQERQEQEARRKLEEQARAKKQTPPASPSQPPIEDRPPSSPI 383
Human     KEQEDRRKAEAEARAQMAKERQEQEARRKLEEQARAKTQTPPVSPAPQPTTEERLPSSPV 420
:*****:*****.***.*:*

mouse      YEDAAPFKAEPSYR----GSEPEPEYSIEAAGIPEAGSQQGLTYTSEPVEYETTEAPGHYQ 476
RAT        YEDAAPLKAEPYSG----SSEPEPEYSTEAAAGLPEASNQGLAYTSEPVEYETTEVPGHYQ 439
Human     YEDAASFKAELSYRGPVSGTEPEPVYSMEAADYREASSQGLAYATEAVYESAEAPGHYP 480
*****:* ** * .:**** * * * . ** .****:*.**.*:*.****

mouse      AEDDITYDGYESDLGITAIALYDYQAAGDDEISFDPDDIITNIEMIDDGWWRGVCKGRYGL 536
RAT        AEDDITYDGYESDLGITAIALYDYQAAGDDEISFDPDDVITNIEMIDDGWWRGVCKGRYGL 499
Human     AEDSTYDEYENDLGITAVALYDYQAAGDDEISFDPDDIITNIEMIDDGWWRGVCKGRYGL 540
***.* ** .*****:*****:*****

mouse      FPANYVELRQ 546
RAT        FPANYVELRQ 509
Human     FPANYVELRQ 550
*****

```

**Supplemental Figure I. Conserved phosphorylation/acetylation site among species.** Phosphorylation sites at Ser-348, Thr-401 and Ser-432 are conserved among mice, rat and human. Acetylation and phosphorylation sites are marked in bold red.

## Supplemental Figure II

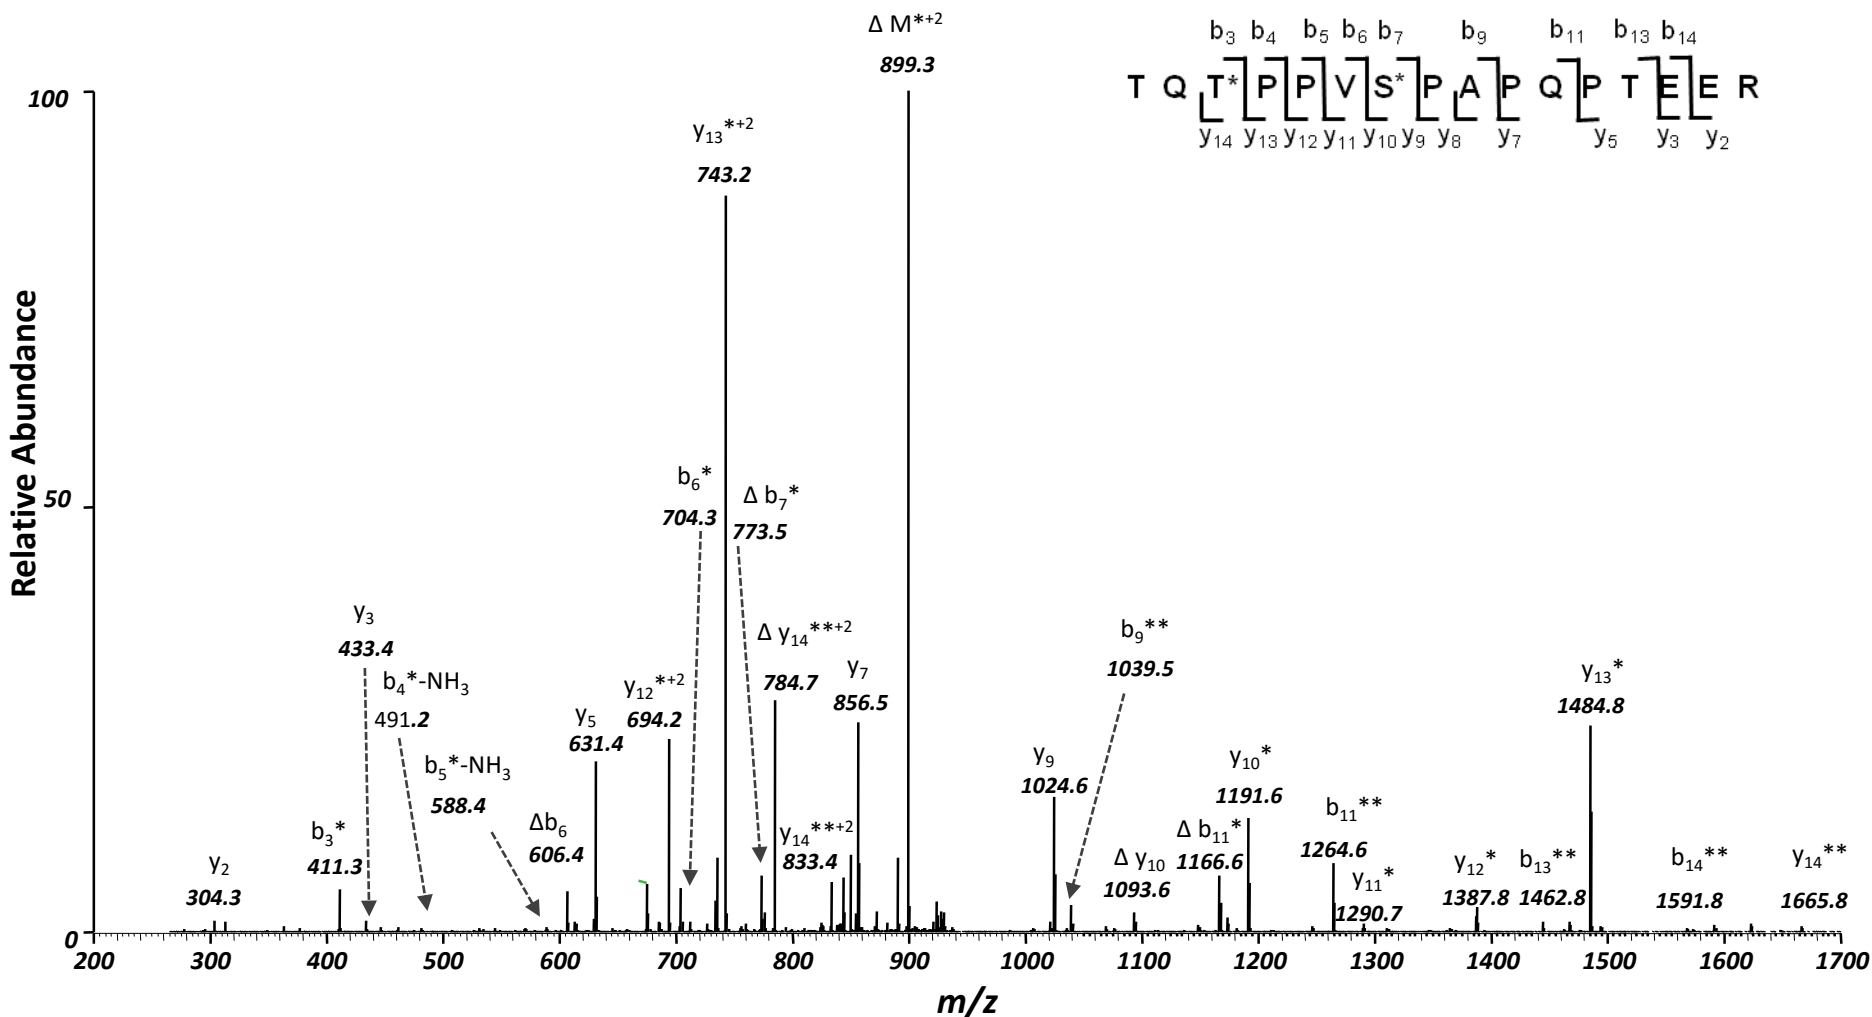

**Supplemental Figure II. Identification of pT401 by nano-LC-MS/MS tandem mass spectrometry.** Human umbilical vein endothelial cells (HUVECs) were treated with AICAR and cortactin was immunoprecipitated for tandem mass spectrometry. MS/MS of phosphorylated cortactin tryptic peptides corresponding to residues 399-414 (TQTPPVSPAPQPTTEER) obtained from the immunoprecipitated mixtures and analyzed by LC-MS/MS. \* indicates that an ion bears a phosphate group, and  $\Delta$  indicates neutral loss of an  $\text{H}_3\text{PO}_4$ .

## Supplemental Figure III

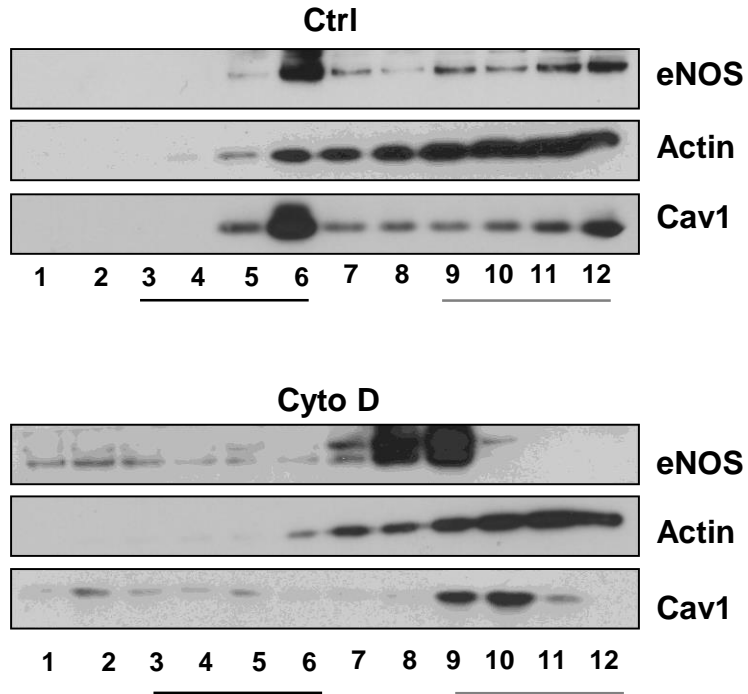

### **Supplemental Figure III. Lipid raft distribution under cytochalasin D treatment.**

Cytochalasin D (cytoD) treatment caused a shift of eNOS, Cav1 and actin from lipid raft fractions to non-lipid raft fractions.

**A**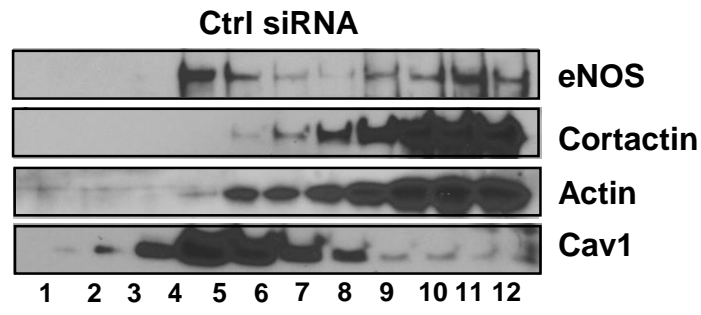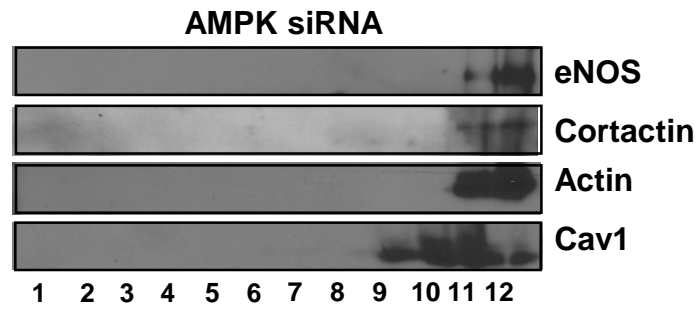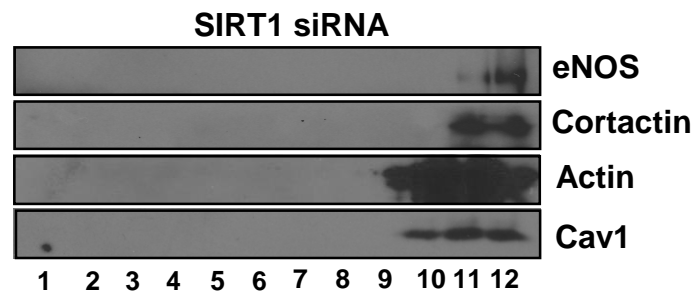**B**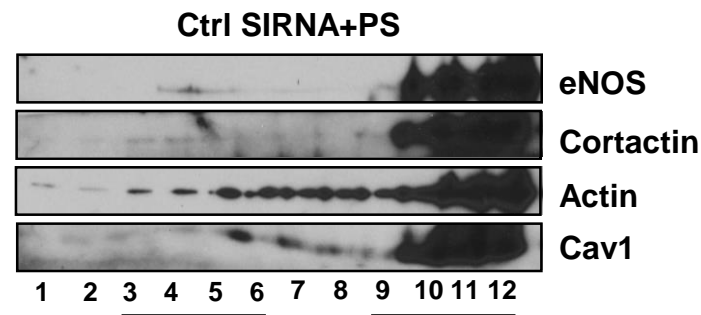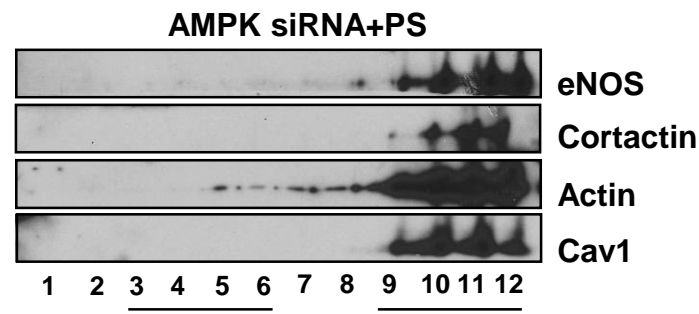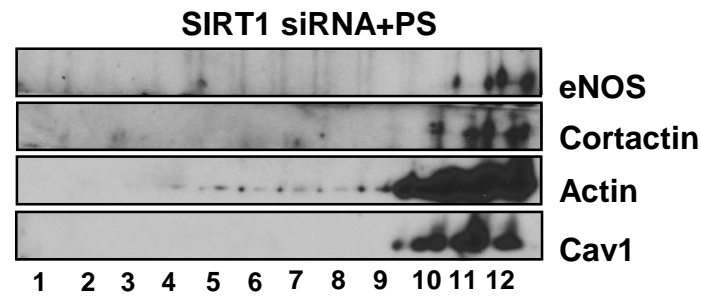

**Supplemental Figure IV. AMPK or SIRT1 knockdown prohibited molecular trafficking.** (A) HUVECs were transfected with scramble control, AMPK or SIRT1 siRNA and then kept under static conditions or (B) subjected to PS. Cells were then fractionized by sucrose gradient ultracentrifugation to observe the distribution of eNOS, cortactin, actin and Cav1 in the lipid raft fraction (3-6) or non-lipid raft fractions (9-12). The distribution of cortactin, actin, eNOS, and Cav-1 was revealed by immunoblotting with antibodies against cortactin, actin, eNOS, and Cav-1.



Supplemental Figure VI

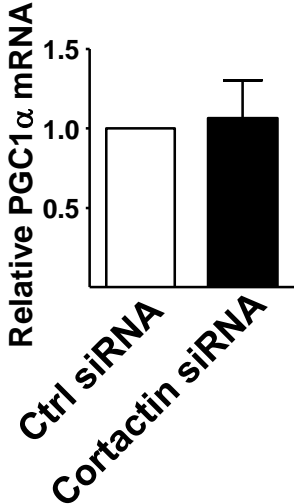

**Supplemental Figure VI. PGC1α expression in cortactin knockdown.** HUVECs were transfected with control or cortactin siRNA and the PGC1α mRNA level was assessed by RT-PCR. The results are mean±SEM from 3 independent experiments.

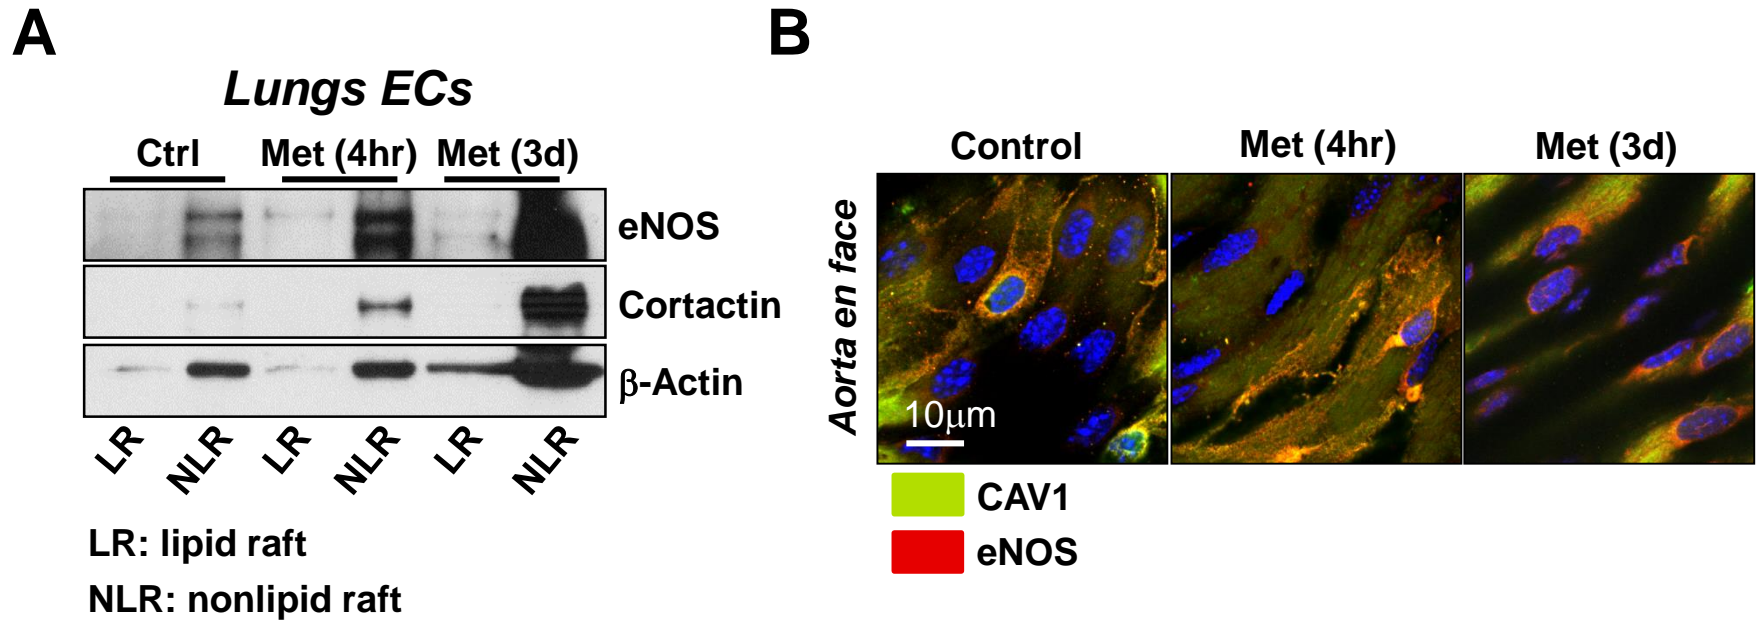

**Supplemental Fig. VII. Metformin increases cortactin and eNOS translocation into nonlipid raft in mouse endothelium.** C57BL/6 mice were administered metformin (200 mg/kg) via i.p. injection. Mice (n=3 per condition) were then sacrificed following 4 hr (acute) or 3 days (chronic). (A) Lung ECs were isolated and protein was separated into lipid raft and nonlipid raft fractions. Immunoblot was performed with the use of anti-eNOS, anti-cortactin, and anti- $\beta$ -actin. (B) *En face* immunostaining of aortic endothelium with the use of anti-CAV1 and anti-eNOS, nuclei are stained blue with DAPI (n=3 mice each condition, 5-8 images for each mouse).



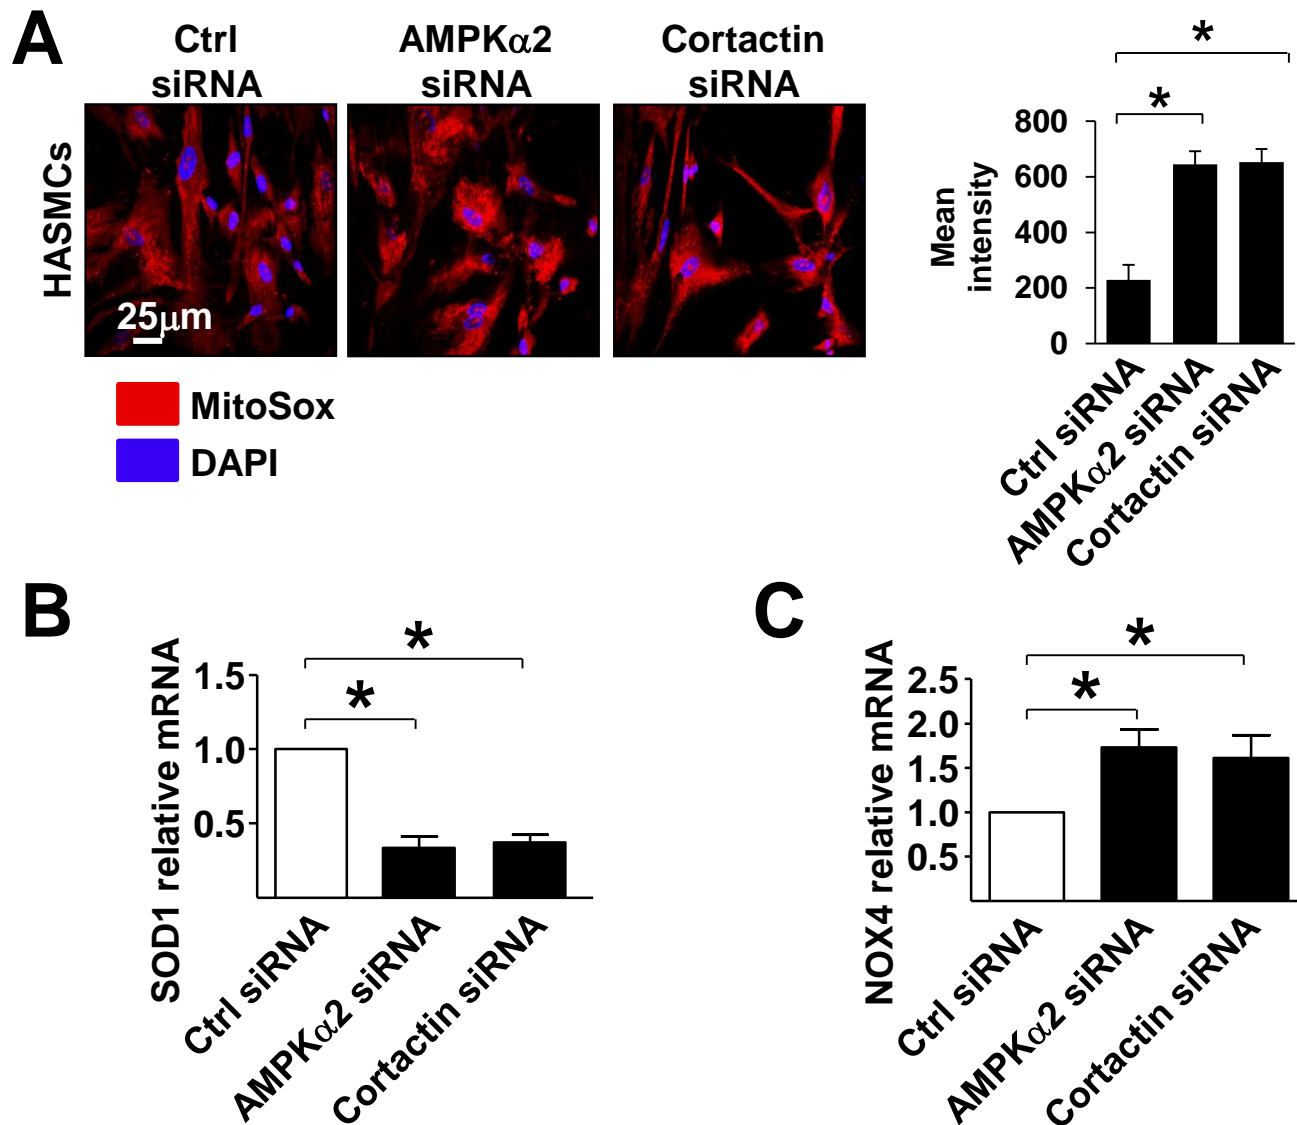

**Supplemental Figure VIII. AMPK/SIRT1-cortactin signaling regulates human aortic smooth muscle cell (HASMC) redox state.** HASMCs were transfected with control siRNA, AMPK $\alpha$ 2, or cortactin siRNA. (A) Representative images of MitoSox staining revealing ROS status in HASMCs in which AMPK $\alpha$ 2 or cortactin was knocked down. (B, C) Total mRNA was extracted and the mRNA levels of SOD1 and NOX4 and compared with those from cells transfected with control siRNA. The results in (A) are representative from 3 independent experiments and in (B, C) are mean $\pm$ SEM from 3 independent experiments.

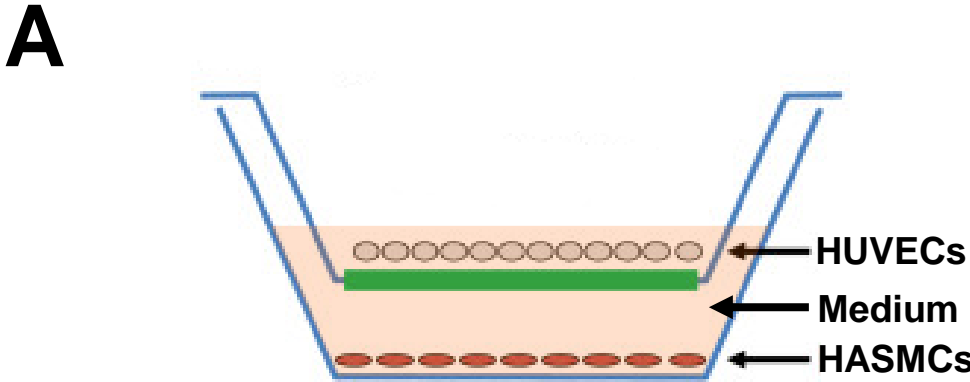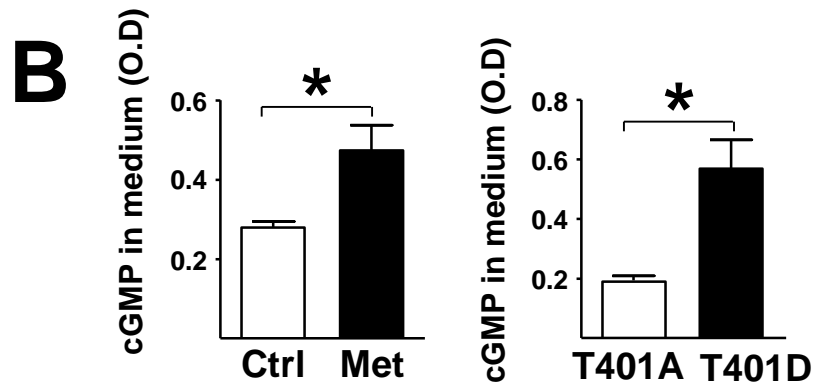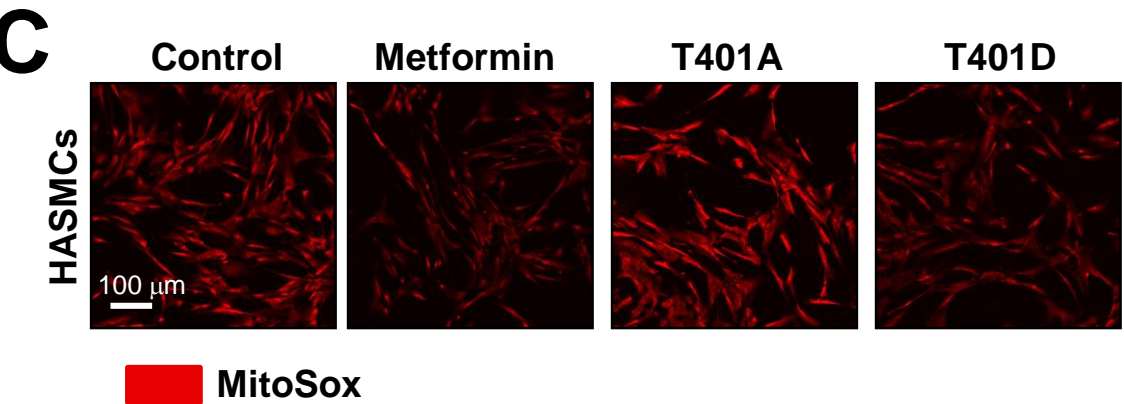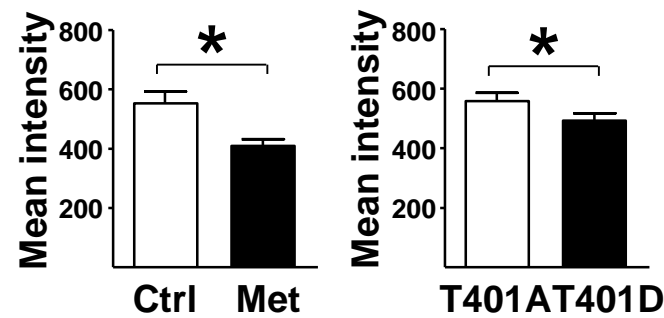

**Supplemental Figure IX. Cortactin in ECs positively regulates HASMC phenotype.** (A) Depiction of a HUVEC-HASMC co-culture system. Meformin treatment for 4 hr or HUVECs were transfected with cortactin T401A/D mutants (48 hr) were used to stimulate the AMPK/SIRT1-cortactin pathway. (B) cGMP level was measured from collected condition media with a kit from Cayman chemical. (C) Representative images of MitoSox staining revealing ROS status of HASMCs co-cultured with HUVECs treated with metformin or transfected with cortactin T401A/D.

Table I: Values of cortactin pThr-401 main sequence ions

| <b>pThr-401 main sequence ions</b> | <b><i>m/z</i></b> |
|------------------------------------|-------------------|
| <b>b ion</b>                       |                   |
| <b>b1</b>                          | -                 |
| <b>b2</b>                          | 230.1             |
| <b>b3</b>                          | 411.1             |
| <b>b4</b>                          | 508.2             |
| <b>b5</b>                          | 605.2             |
| <b>b6</b>                          | 704.3             |
| <b>b7</b>                          | 791.3             |
| <b>b8</b>                          | 888.4             |
| <b>b9</b>                          | 959.4             |
| <b>b10</b>                         | 1056.5            |
| <b>b11</b>                         | 1184.5            |
| <b>b12</b>                         | 1281.6            |
| <b>b13</b>                         | 1382.6            |
| <b>b14</b>                         | 1511.7            |
| <b>b15</b>                         | 1640.7            |
| <b>y ions</b>                      |                   |
| <b>y1</b>                          | 88.1              |
| <b>y2</b>                          | 152.6             |
| <b>y3</b>                          | 217.1             |
| <b>y4</b>                          | 267.6             |
| <b>y5</b>                          | 316.2             |
| <b>y6</b>                          | 380.2             |
| <b>y7</b>                          | 428.7             |
| <b>y8</b>                          | 464.2             |
| <b>y9</b>                          | 512.8             |
| <b>y10</b>                         | 556.3             |
| <b>y11</b>                         | 605.8             |
| <b>y12</b>                         | 654.3             |
| <b>y13</b>                         | 702.9             |
| <b>y14</b>                         | 793.4             |
| <b>y15</b>                         | 857.4             |

Low energy collision induced dissociation was used for fragmentation to generate b and y ions. *m/z* , mass to charge ratio.

Table II: Serum lipid profile of CTTN<sup>+/+</sup>/ApoE<sup>-/-</sup> and their CTTN<sup>+/-</sup>/ApoE<sup>-/-</sup> littermates

| Serum lipids        | CTTN <sup>+/+</sup> , ApoE <sup>-/-</sup> , mg/dL (n = 15) | CTTN <sup>+/-</sup> , ApoE <sup>-/-</sup> , mg/dL (n = 11) |
|---------------------|------------------------------------------------------------|------------------------------------------------------------|
| TC                  | 2651±85                                                    | 2567±104                                                   |
| TG                  | 277±23                                                     | 209±25                                                     |
| LDL-C               | 1926±82                                                    | 1765±88                                                    |
| HDL-C <sup>†</sup>  | 669±116                                                    | 760±78                                                     |
| VLDL-V <sup>*</sup> | 55±5                                                       | 42±5                                                       |

All values are expressed as means ± SEM averaged from indicated number animals in each group. HDL-C, HDL-cholesterol; LDL-C, LDL-cholesterol; TC, total cholesterol; TG, triglyceride; VLDL-C, very-low-density lipoprotein-cholesterol. \*The TG value is divided by 5 to estimate VLDL-C levels. † The HDL-C value was determined by the following formula: HDL-C = TC - LDL-C - (TG/5).

Table III: Sequences of primers used in mRNA RT-qPCR

| <b>Gene</b> | <b>Species</b> | <b>Sequence</b> |                         |
|-------------|----------------|-----------------|-------------------------|
| E-selectin  | Mouse          | Forward         | CCAATCTGAAACATTCACCGAGT |
|             |                | Reverse         | CGAGTCTTTGGTTCGTTGGATG  |
| MCP-1       | Mouse          | Forward         | TTAAAACCTGGATCGGAACCAA  |
|             |                | Reverse         | GCATTAGCTTCAGATTTACGGGT |
| VCAM-1      | Mouse          | Forward         | AGTTGGGGATTTCGGTTGTTCT  |
|             |                | Reverse         | CCCCTCATTCCTTACCACCC    |
| ICAM-1      | Mouse          | Forward         | GCTACCATCACCGTGTATTCG   |
|             |                | Reverse         | TAGCCAGCACCGTGAATGTG    |
| IL6         | Mouse          | Forward         | GGCGGATCGGATGTTGTGAT    |
|             |                | Reverse         | GGACCCAGACAATCGGTTG     |
| IL1 $\beta$ | Mouse          | Forward         | GCAACTGTTCTGAACTCAACT   |
|             |                | Reverse         | ATCTTTTGGGGTCCGTCAACT   |
| iNOS        | Mouse          | Forward         | GTTCTCAGCCCAACAATACAAGA |
|             |                | Reverse         | GTGGACGGGTCGATGTCAC     |
| TLR2        | Mouse          | Forward         | GCAAACGCTGTTCTGCTCAG    |
|             |                | Reverse         | AGGCGTCTCCCTCTATTGTATT  |
| Arginase-1  | Mouse          | Forward         | CTCCAAGCCAAAGTCCTTAGAG  |
|             |                | Reverse         | AGGAGCTGTCATTAGGGACATC  |
| CD206       | Mouse          | Forward         | CTCTGTTTCAGCTATTGGACGC  |
|             |                | Reverse         | CGGAATTTCTGGGATTCAGCTTC |
| FIZZI       | Mouse          | Forward         | CCAATCCAGCTAACTATCCCTCC |
|             |                | Reverse         | ACCCAGTAGCAGTCATCCCA    |
| Ym1         | Mouse          | Forward         | CAGGTCTGGCAATTCTTCTGAA  |
|             |                | Reverse         | GTCTTGCTCATGTGTGTAAGTGA |
| CD163       | Mouse          | Forward         | ATGGGTGGACACAGAATGGTT   |
|             |                | Reverse         | CAGGAGCGTTAGTGACAGCAG   |
