# Supplementary material
Source: PubMed Central journal article supplement (PMC5391843)

# Atheroprotective flow

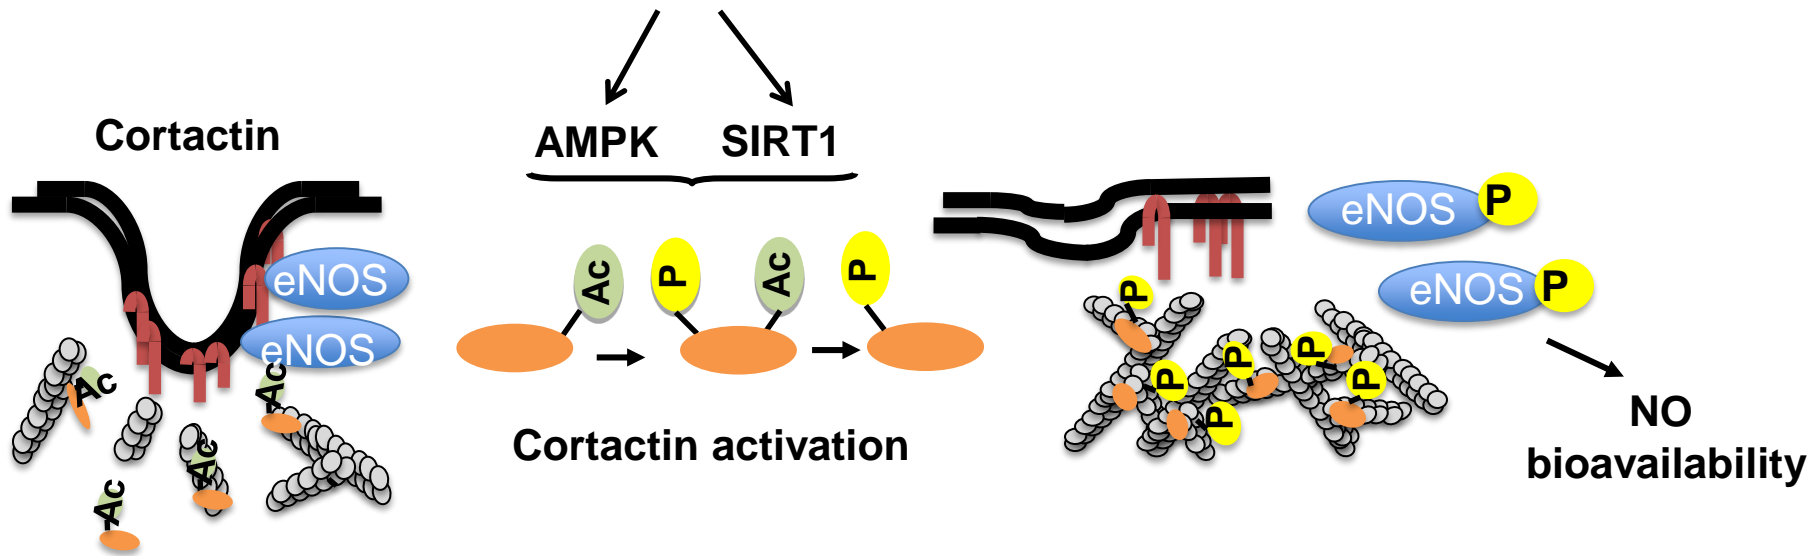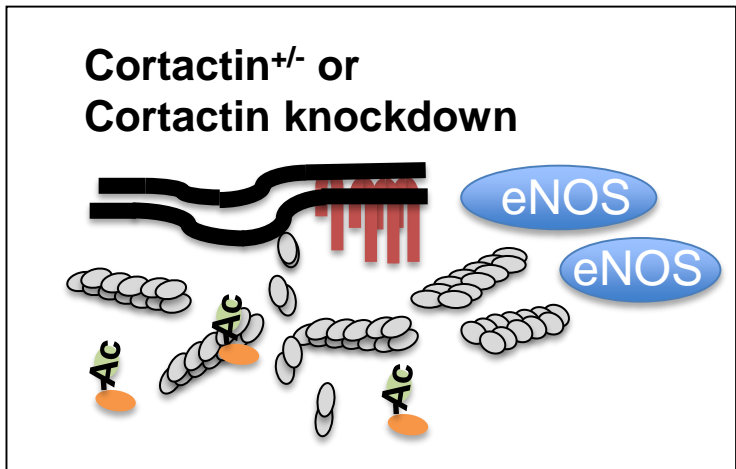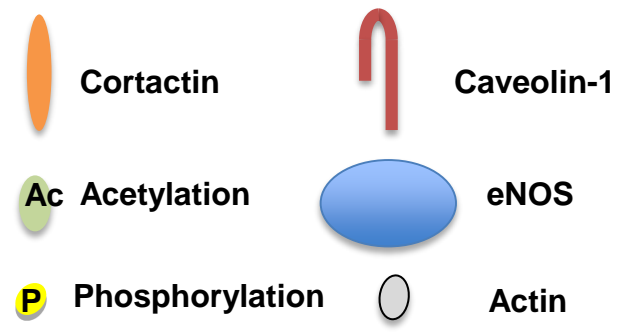

Supplement: NIHMS819011-supplement-Graphic_abstract.pdf [file NIHMS819011-supplement-Graphic_abstract.pdf]
